# Supplementary material
Source: PubMed Central journal article supplement (PMC5882556)

# Supplementary Information

## Organic molecule-based photothermal agents: An expanding photothermal therapy universe

Hyo Sung Jung,<sup>a,b,‡</sup> Peter Verwilt,<sup>a,‡</sup> Amit Sharma,<sup>a</sup> Jinwoo Shin,<sup>a</sup> Jonathan L. Sessler,<sup>\*,b,c</sup> and Jong Seung Kim<sup>\*,a</sup>

<sup>a</sup> Department of Chemistry, Korea University, Seoul 02841, Korea

<sup>b</sup> Department of Chemistry, The University of Texas at Austin, Austin, Texas 78712-1224, USA

<sup>c</sup> Center for Supramolecular Chemistry and Catalysis, Shanghai University, Shanghai 200444, China

<sup>‡</sup> These two authors contributed equally.

*E-mail: sessler@cm.utexas.edu; jongskim@korea.ac.kr*

### Contents

#### 1. Supplementary Figure S1

❖ **Cyanines**

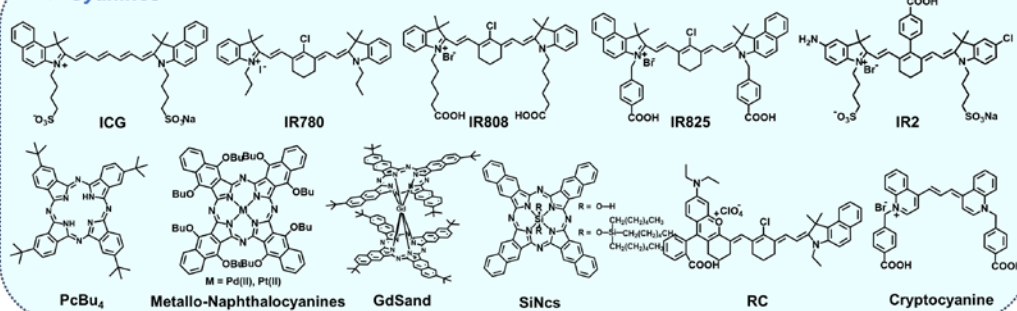

❖ **Croconaines**

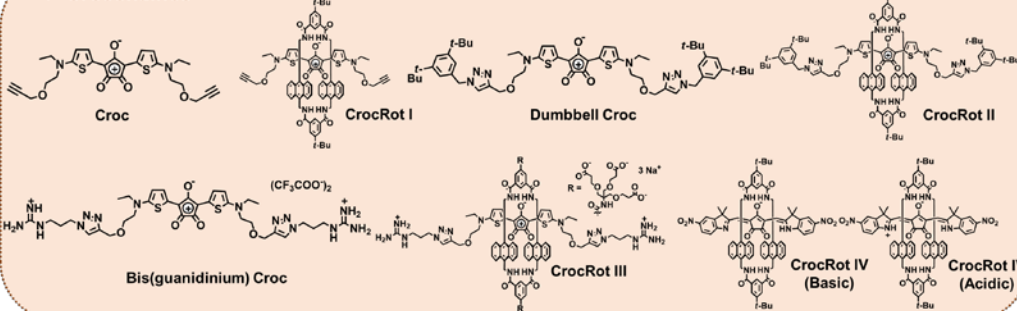

❖ **Porphyrins**

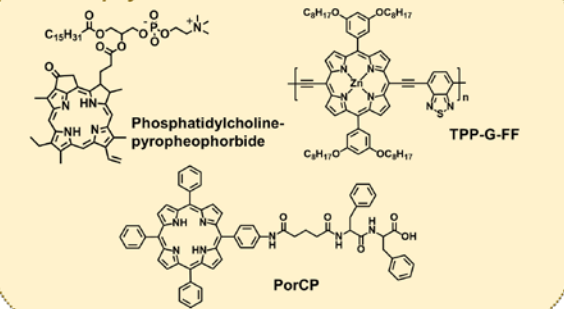

❖ **Polymers**

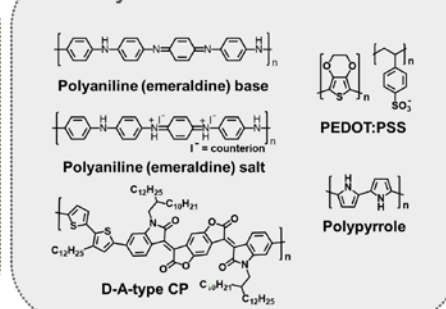

❖ **Diketopyrrolopyrroles**

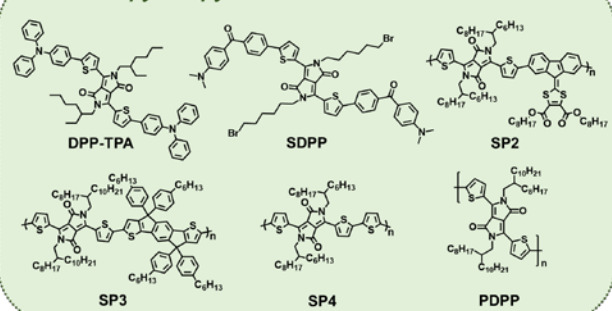

❖ **Other agents**

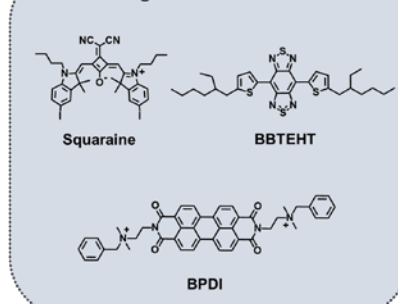

Supplement: NIHMS950653-supplement-ESI.pdf [file NIHMS950653-supplement-ESI.pdf]
